# Supplementary material for: Multi-decadal atmospheric carbon dioxide measurements in Central Europe, Hungary
Source: Copernicus journal article supplement (doi:10.5194/amt-2024-29), 2024-04-04
Supplement: Supplementary file 1 [file amt-2024-29-supplement.pdf]

## SUPPLEMENTARY FIGURES

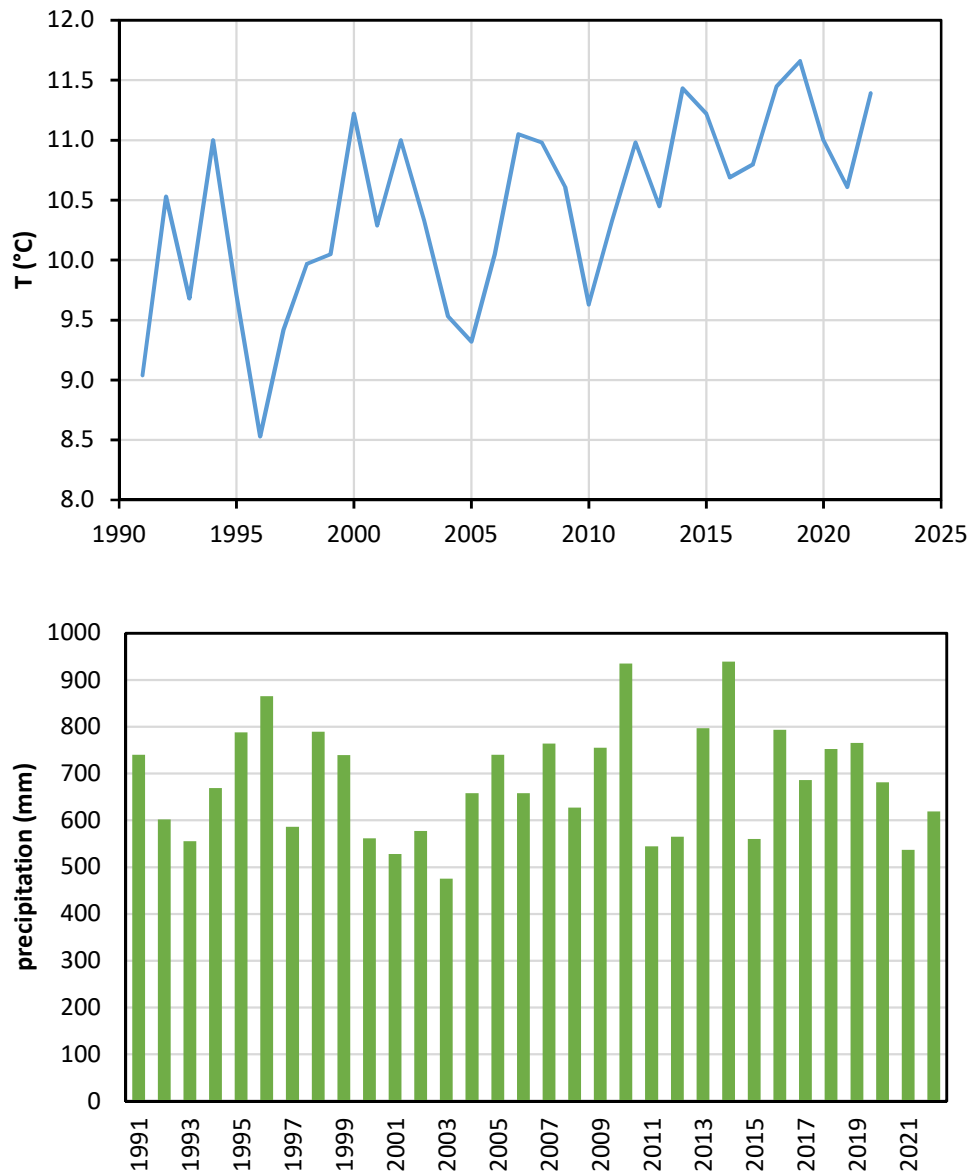

Figure S1: Temporal variation of the annual mean temperature (upper panel) and the annual amount of precipitation (lower panel) at HUN (Hungarian Meteorological Service, 2023). The positive trend in temperature (1991-2020:  $0.54 \pm 0.13$  °C decade<sup>-1</sup>) is statistically significant at  $p < 0.01$ . Statistically significant changes in the precipitation amount cannot be detected.

Reference:

Hungarian Meteorological Service: Meteorological Database, [https://odp.met.hu/climate/homogenized\\_data/gridded\\_data\\_series/daily\\_data\\_series/](https://odp.met.hu/climate/homogenized_data/gridded_data_series/daily_data_series/), - last accessed 12 September 2023, 2023.

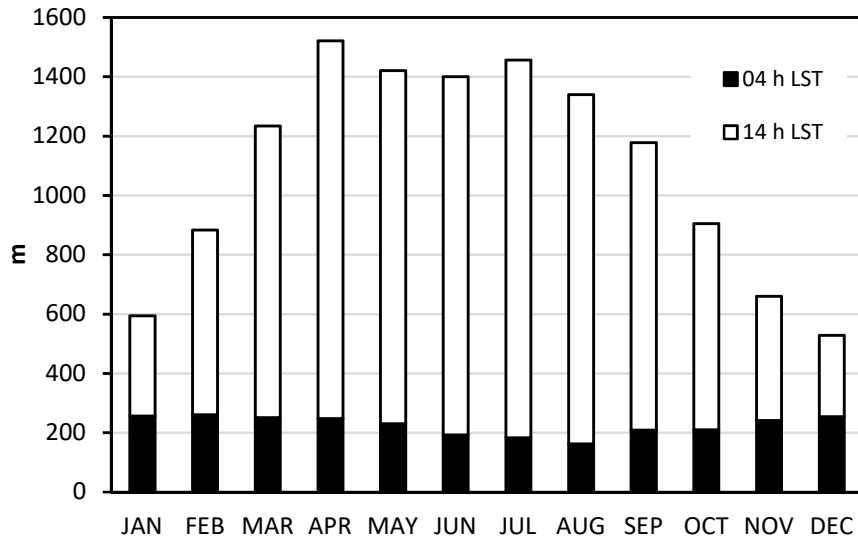

Figure S2: Mean seasonal variation of the nighttime (4 h local standard time) and early afternoon (14 h local standard time) height of the planetary boundary layer (1994-2022). Data are based on ECMWF ERA5 reanalysis (03 and 13 UTC) accessed on 8 October 2023

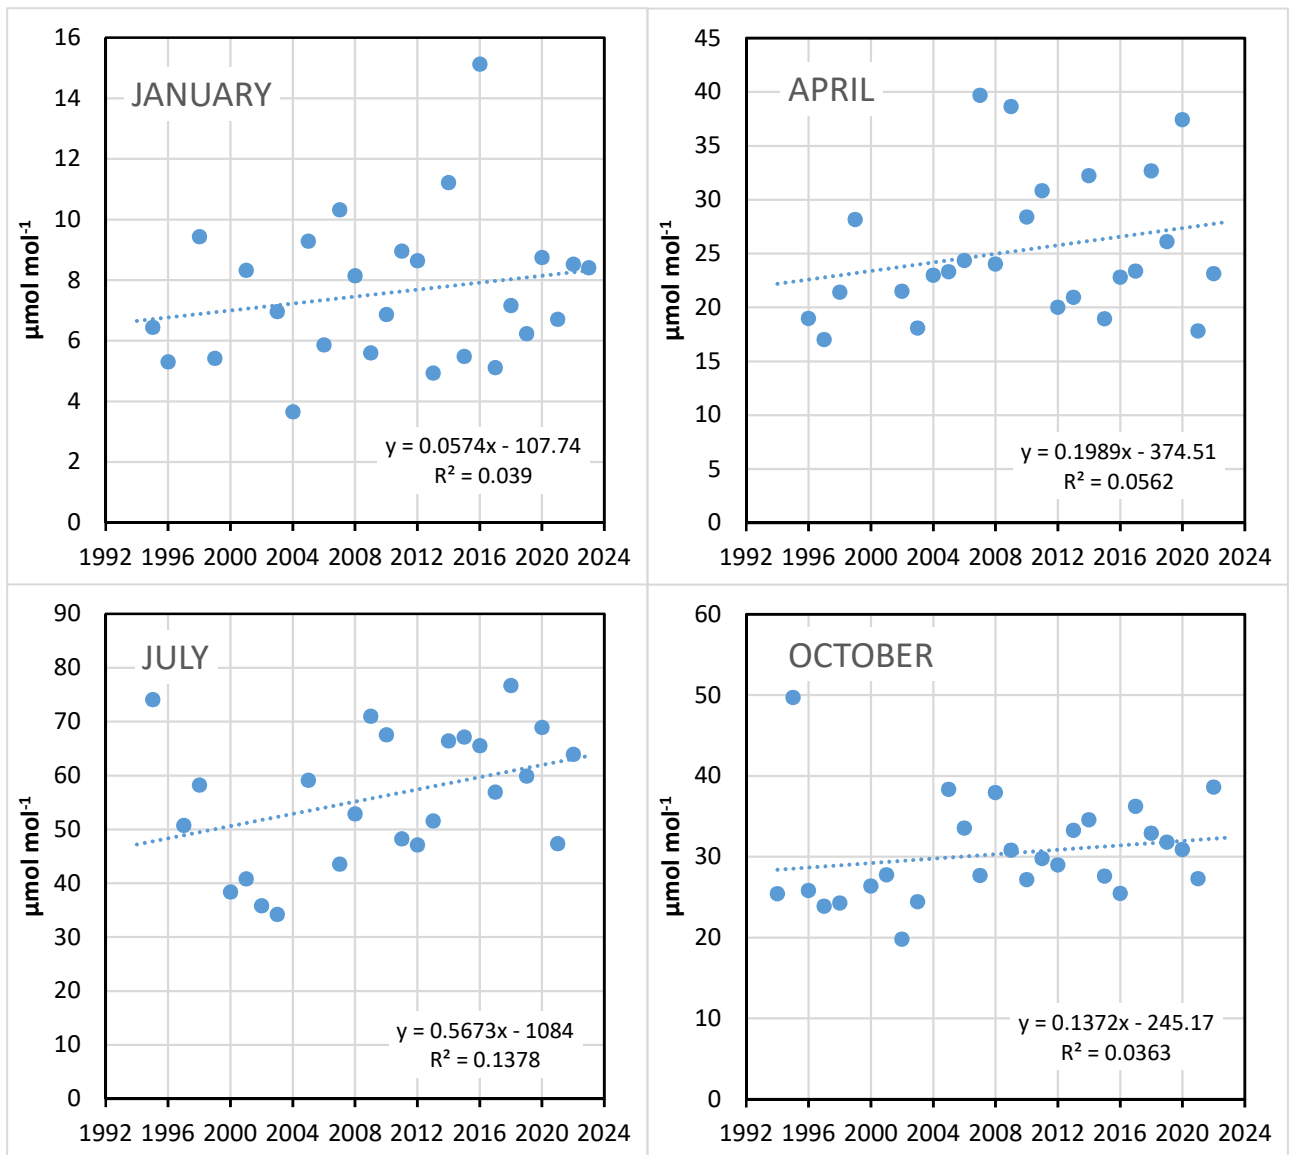

Figure S3: Temporal variation of the monthly mean diurnal amplitude of CO<sub>2</sub> concentration at 10 m elevation

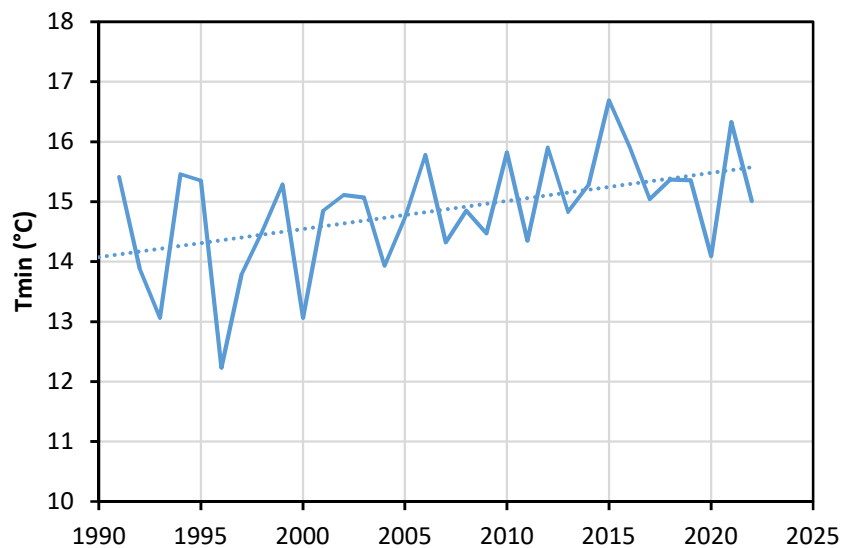

Figure S4: Temporal variation of the mean daily minimum temperature at Hegyhátsál in July. The trend ( $0.47 \pm 0.17 \text{ } ^\circ\text{C decade}^{-1}$ ) is statistically significant at  $p < 0.01$ .
