# Supplementary material for: Multi-decadal atmospheric carbon dioxide measurements in Central Europe, Hungary
Source: Copernicus journal article supplement (doi:10.5194/amt-2024-29), 2024-04-04
Supplement: Supplementary file [file amt-2024-29-AC2-supplement.pdf]

## Authors' response to Referee#2

First of all, we would like to thank the Referee for his/her positive evaluation of our manuscript and would like to thank him/her for the comments and suggestions, which have helped us to improve the manuscript. Below you will find our detailed, point-by-point responses to the comments and suggestions. Responses are given in blue.

### General comment

This paper presents 30 years of measurements of atmospheric carbon dioxide from a tall tower in Hungary. The Hegyhátsál station and its CO<sub>2</sub> measurements have already been well characterised in numerous previous publications and this paper adds an overarching view for the continuous long time series from 1994 to 2023 before joining the Integrated Carbon Observation System (ICOS) network. The changes in instrumentation and measurement setups during that period are presented and sampling uncertainties evaluated. Using the 30 years' worth of data, seasonal trends and features of the vertical gradient of CO<sub>2</sub> (10-115 m above ground) are investigated and put into a wider context. Changes such as the CO<sub>2</sub> seasonal trends and anomalies are tested for their statistical significance and explanations considered. Long-term trends and changes in growth rates are shown and connections are made to the El Niño-Southern Oscillation (ENSO).

The paper makes a valuable contribution to the body of work investigating and interpreting long time series of in situ carbon dioxide measurements from ground-based monitoring stations. Publication is recommended once the minor issues listed below have been addressed.

### Specific questions/issues

#### 1 Introduction

Line 23: "measurements were not convincing" – it should be clarified to whom they were not convincing, e.g. the scientific community at the time, or rather from current view point or else. Also, the mentioned technical and representativity problems should be briefly explained, named or outlined.

The trend shown by Callender was not convincing because of the uncertainties caused by the large scatter of the data, the different measurement methods used, the different sampling protocols, and the different characteristics of the sampling locations. The sentence in line 23 of the original manuscript has been completed by the above explanation.

Line 27: for context, consider naming the major measurement networks in which the monitoring stations were established, e.g. NOAA, GAW, etc. and/or add reference to World Data Centre for Greenhouse Gases.

In the revised manuscript, we mention the WMO BAPMoN/GAW network and the NOAA Global Cooperative Air Sampling Network. WDCGG is mentioned as the data source.

Line 28/29: consider adding the first or longest running station as an example each for the list of "arctic regions, high mountain peaks, mid-oceanic islands".

It is a general sentence saying that the first monitoring sites were set up in very isolated remote places. In the parentheses, which can be omitted without changing the meaning of the sentence, give some examples of typical “very isolated remote places”. Giving examples of the examples in further embedded parentheses would make the sentence too complex and difficult to follow. Nevertheless, if the Referee insists on seeing example stations we can add them in a second revision.

Line 31: “they could not provide detailed information”, give an example of what is meant here with “detailed information”

The sentence has been completed by the biosphere-climate interaction as an example for which the remote sites could not give detailed information.

Line 38: give a brief explanation what is meant by tall tower, e.g. “towers of up to 100s of metres high”

The definition of tall towers as 100+ meter tall structures is given in the revised sentence.

Line 39: influence by local vegetation: any type of localised influence should be relevant here, including local anthropogenic sources such as e.g. from industrial activity. Consider rephrasing.

The sentence has been rephrased to cover all local natural or anthropogenic sources/sinks.

Line 43-44: Five years of parallel measurements of K-pusztá and Hegyhátsál: It would have been interesting to include the period of parallel measurements in this manuscript to extend the time series from the region, and add information to the spatial representativity of the measurements. If such an analysis already exists, please provide a citation or consider adding a short section that includes the measurements at K-pusztá.

A paper on this topic was published at the end of the parallel measurements (Haszpra, 1999a), which is referred to in Section 2.5 of the original manuscript. A comparison and possible combination of the two data series would go far beyond the scope of the present manuscript. The discussion of the effects of the different instrumentation, sampling protocol, and environment (different soil types, land cover, etc.) would blow up the paper, therefore, we did not want to go in that direction.

Line 50: determination of the carbon budget of the atmosphere: consider adding a reference, such as e.g. the Global Carbon project <https://www.globalcarbonproject.org/index.htm>

In this general introductory section, we did not want to give a long list of CO<sub>2</sub> inversion models. However, we have included the Global Carbon Project in the revised manuscript as a kind of umbrella project in this field.

Line 58: model results depends on coverage: is temporal or spatial coverage meant here? What role does the quality of measurements play?

The emphasis is on spatial coverage because a monitoring site can only be considered to exist if it produces data, i.e. the temporal coverage is given. The sentence referred to has been rephrased. The higher the uncertainty of the measurement data or they are biased the higher

the uncertainty of the model results. Modelers could provide a more detailed answer to the question.

Line 62/63: information on emissions from Western Europe: looking at Fig.2 the given statement is supported, however in case of northerly/easterly/southerly conditions, the eastern stations can also provide emission information from other parts of Europe. In such conditions it also serves as a regional “background” to western/central Europe in model studies and inversions.

Yes, the Referee is absolutely right. However, in this general introduction, we could not go into the analysis of atypical meteorological situations because such a detour would have destroyed the structure of the section.

Line 68: delete “the” before “atmospheric”. Consider adding at the end of sentence “, which are also reported to WDCGG”.

Corrected. The sentence has been moved into Section 2.2 as Referee#1 requested.

## 2 Measurements and data

Line 78: high spatial representativeness: is it possible to give a quantitative measure or further description what is meant by “high” spatial representativeness?

According to the ICOS STILT model, the most important 50 % sensitivity area of the station (115 m) is 355 thousand km<sup>2</sup>. This information is given in the caption of Fig. 2 of the revised manuscript.

Section 2.2. Monitoring system: Are any type of inlet filter used, to e.g. filter aerosol? If so, please provide technical details. If no filters are used, please comment on how fast/slow contamination by aerosol or particulate matter occurs in the lines or the KNF pumps.

The pumps are protected by Whatman GF/A glass microfiber filters. This information is inserted in the revised manuscript.

Line 157/158: please provide details on the typical ratio of bypass/sample flow

The sample flow rate was regulated by the Picarro analyzer itself, and it was not directly measured in the system presented. The important step was to have a stable overflow through the bypass to prevent the contamination of the sample air. The bypass flow was set to ~200 cm<sup>3</sup> min<sup>-1</sup>. This value is given in the revised manuscript. In the measurement system rebuilt in 2023 for ICOS, the sample flow rate is also measured, and it is around 180 cm<sup>3</sup> min<sup>-1</sup>.

Line 175-178: it could be useful to introduce, differentiate and define terms like e.g. “sampling uncertainty, which is a result of non-continuous sampling of the atmospheric variability within an hour” and “measurement, i.e. analytical, uncertainty”. The description “high frequency sampling” can potentially be misleading, as not e.g. 10 Hz data logging is meant but the cycling through to each inlet height in sequence. Consider rephrasing the sentence.

The uncertainty in the hourly average concentrations due to the discontinuous sampling at the intakes is discussed in the referenced paper. The term “high-frequency sampling” may indeed be misinterpreted, therefore, the sentence has been rephrased.

Line 180: see also previous point, consider being more specific, e.g. “sampling time/switching frequency through inlet heights”

The sentence has been rephrased.

Line 187: low-uncertainty data: in the context of the section it seems clear that reference is made to the sampling uncertainty that arises out of the large atmospheric variability when e.g. the night time boundary layer breaks up. However, the way it is presented here could give the impression that the data from boundary layer transition periods is not used in models because of the above-mentioned sampling uncertainty. This however is not the main reason and thus consider rephrasing these sentences.

The misleading sentence has been removed.

Line 188: delete “when the demand appears”. This statement is a home truth, but possibly worth reiterating.

The sentence has been removed.

Line 191: consider changing adjective “remarkable” to “great”, quantifying also e.g. from x to xx m.

“Remarkable” has been changed to “great”, and a range has been given in the revised manuscript.

Section 2.4. An extended section and assessment on the NOAA flask and in situ measurement comparison would be welcome.

An extended evaluation of the flask samples would go beyond the scope of the present study. The reasonable solution would be a joint work with NOAA covering flask sampling sites under different environmental conditions. At Hegyhátsál, the rigorous comparison of the flask and in situ measurements is hindered by the different locations of the intakes (flask: 96 m, in situ: 82 m and 115 m) and the temporal asynchrony between the flask samples and the in situ samples. For example, when the flask sample is taken at 96 m the in situ system may be sampling at 10 m.

Line 236: in the larger than 3 sigma cases, the presumed reasons could be further investigated and reasons confirmed, e.g. utilising the high-resolution continuous data during the flask sampling periods.

There are no high-resolution continuous data for the periods when the flasks are gradually filled up. The in situ system changes the intake sampled every two minutes, and only 30 s of data are available from each intake in each sampling period. In addition to the temporal asynchrony of the sampling, the different locations of the flask sampling intake and the in situ intakes cause problems. Only a statistical comparison of the two methods is possible. The

causes of  $>3\sigma$  deviations can only be identified with a reasonable probability in a few obvious cases.

Line 237: please specify the time period over which the mean deviation is calculated. Is the comparison robust throughout that time frame, or are there periods (years?) when the WMO compatibility goal is not achieved? Can a difference be seen for the different types of analysers and/or setups? Can a significant relationship be observed for larger flask-in situ differences when atmospheric variability is high?

The revised manuscript explicitly says that the comparison was made over the entire period (1994-2023). As there are temporal and spatial asynchronies between the flask and in situ measurements, only the long-term statistical analyses are defensible. Any other attempt may be challenged.

Line 241: elaborate or give examples what is meant by “technical issues”

The small reduction in the bias and scatter could be caused not only by the instrument change at Hegyhátsál but also by any possible technical improvement at NOAA. The staff at Hegyhátsál was also changed at that time, which might have affected the sample quality. Therefore the sentence has been deleted.

Line 243: how many flask samples contribute to that mean and standard deviation?

As the statement can be questioned, the sentence has been deleted (see above).

Section 2.5. Data selection. Line 249/250: consider adding information in the supplementary material to support the statement made on the lack of directional difference, e.g. a wind rose showing the residuals of detrended CO<sub>2</sub> concentrations

A reference to a paper showing the sectorial distribution of the CO<sub>2</sub> concentrations at Hegyhátsál has been inserted into the revised manuscript to support the statement.

### 3 Results and discussion

Section 3.1. Line 264 and Line 311-312, Fig S2 and statement on nighttime boundary layer heights: please comment on the uncertainties in the BL height determination in the ECMWF ERA5 data product? The dynamics of the nighttime BL is given as main reason for the high summer amplitudes of CO<sub>2</sub> (Fig 5), however it seems the effect of the daytime BL (and the dilution effect) will have a lot larger impact on the large CO<sub>2</sub> amplitude.

The calculated boundary layer heights depend on the algorithm used, and each algorithm has its internal uncertainty. In this study, ERA5 boundary layer height data were accepted as they are. The CO<sub>2</sub> measurements show that the trend of the high concentrations (upper percentiles) is higher than that of the low percentiles. The high concentrations form exclusively during the night, therefore, we can state that the summer daily concentration amplitudes are dominated by the nighttime processes. In the deep, well-mixed daytime summer boundary layer the CO<sub>2</sub> concentration is close to the continental background, or at least not much lower.

Line 316/317: can the statement on the “increasing respiration due to significant increase in temperature” be further supported. Is the observed nighttime temperature increase consistent with the suggested corresponding increase in respiration rates (from literature or e.g. nearby flux measurement data)? Has the vegetation cover(type and cover spatially) around the station changed in the time period, and if so, could that play a role in the observed trends?

For a more quantitative support, a boundary layer budget model should be developed and applied. At Hegyhátsál the surface-atmosphere CO<sub>2</sub> flux is measured by an eddy covariance system mounted at 82 m elevation on the tower. It has been operational since 1997. According to the study of Barcza et al. (2020), ecosystem respiration shows a significant positive trend, which may support our hypothesis. Unfortunately, the study referred to does not evaluate the trend with monthly resolution. The monitoring site is located in an agricultural region where the cultivars in the individual small plots change every year. However, the overall mixture of the cultivars in the region does not change. It should also be mentioned that the footprint of the concentration measurements and the flux measurements are quite different. Nevertheless, the revised manuscript refers to the study of Barcza et al. as it makes our hypothesis plausible.

Line 321/322: although reference to Haszpra et al., 2015 is made, please briefly describe salient points of the aircraft campaign, e.g. how was the top of the boundary layer sampled/derived (aerosol, T-profiles)? How many flights contribute to that mean, and what is meant by the “top of the tower underestimates the mean planetary boundary layer”? What could be the reason for the observed mean differences with the aircraft-based measurements? Please also be more specific as to how these results can be “informative for those using models with coarse vertical resolution” (Line 324).

The vertical concentration profile along the tower is mentioned in the manuscript only for completeness, devoting only a few sentences to the topic without conclusions. The profiles do not show any trend, and they correspond to the theoretical expectations. The spatial representativeness of the measurements at the top of the tower is the highest. Referring to the aircraft measurements we mention that even the measurements at the top of the tower are somewhat biased from the mean boundary layer concentrations. The discussion of the vertical profile of the concentration is not a major point of the present study, therefore, the details of the aircraft measurement campaign do not fit into the structure of the manuscript. The details of the campaign are given in the referenced paper.

Section 3.2. Line 368/9: please provide a citation/reference for this statement

A reference to Figure 8 has been inserted.

Line 374/375: please provide data and/or a citation/reference for this statement. Also comment on the role of regional sources in winter, e.g. from fossil fuel combustion for heating and energy?

January and February are the coldest months in the region, therefore, changes in heating and energy demand cannot be the cause of the decreasing atmospheric CO<sub>2</sub> concentration from January. This statement has been inserted into the revised manuscript.

Line 381/381: delete “but to the author’s knowledge, the role of the changes in the dynamics of the atmosphere has not yet been studied in details.”

Although we think this sentence is important suggesting research in this understudied area, we have deleted it following the Referee's request.

Line 397: as general statement okay, however please be more location specific. Are additional phenology data from e.g. the Hungarian Met Service or else available that could be used for comparison and support here?

The onset of the growing season is plant-specific, therefore only a general statement can be made for an extended region like the footprint area of the tall-tower concentration measurements. Not forgetting about the contribution of the dynamics of the atmosphere, the date of the spring zero-crossing is related to the beginning of the growing season. However, this relationship is only qualitative on this spatial scale.

Line 397-400: provide guidance as which papers are relevant for the region/Hungary, and/or provide additional ones that show trend in Hungary

We are not aware of any Hungarian or regional studies. The papers referenced here either study the phenomenon on the Northern Hemisphere midlatitude scale or contain information relevant to the region.

Line 408: statement is made that trend is not significant, please provide details on trend and p value

The trend and its probability level are given in the revised manuscript.

Line 421-423: please comment on the uncertainty that is involved in the seasonal detrending, that could affect the trend analysis and thus possible detection of small trends

Although we cannot comment on the uncertainty of the algorithm applied by the CCGCRV software, we have added the trend and its probability level to the revised manuscript.

Line 425: decreasing winter peaks: please consider other reasons for decreasing winter peaks such as e.g. mild winters (less heating), events such as economic slowdown in the region and recently Covid-19 pandemic.

In the revised manuscript the milder winters, the presumably decreasing heating emissions are also mentioned. The economic slowdowns in the mid-2000s and recently, as well as the COVID-19 pandemic can have little effect on the 30-year trend.

Line 427: vague statement, consider rephrasing

The statement has been deleted.

Section 3.3. Line 449: It is unclear what is meant by "emissions vary in much narrower ranges". The previous sentence contains information on atmospheric concentration, here emissions are mentioned, which does not directly follow on from the data from Hegyhátsál.

To link the two sentences we have inserted the following explanation into the revised manuscript: globally  $1 \mu\text{mol mol}^{-1}$  increase corresponds to approximately 7,8 Pg CO<sub>2</sub> net input into the atmosphere.

Figure 12: please double-check the values of the growth rates for Hegyhátsál. Consider putting them in context with the global growth rate, as e.g. published in the WMO Greenhouse Gas Bulletin Nr.19 (Nov 2023) <https://library.wmo.int/records/item/68532-no-19-15-november-2023?offset=1> . Global growth rates have been above 1 umol/mol/year since 1994, in the order of 1 to ~3.2 umol/mol/year.

The revised Fig. 12 also shows the temporal variation of the global growth rate calculated from the globally averaged marine surface monthly mean data ([https://gml.noaa.gov/webdata/ccgg/trends/co2/co2\\_mm\\_gl.txt](https://gml.noaa.gov/webdata/ccgg/trends/co2/co2_mm_gl.txt)) for comparison. The growth rate data for Hegyhátsál in the figure have been checked and found correct.

Line 466-485: this section describes the observed pattern with ENSO, detailing lag times, however not sufficient detail is given what causes the effect on CO<sub>2</sub> and how this information can be utilised and for whom it is relevant?

The purpose of this section is to show that the effect of a large-scale regional phenomenon in the tropical/southern subtropical Pacific Ocean can also be clearly detected in continental Europe despite the large distance and huge regional anthropogenic emissions. The mechanism of the teleconnection is not discussed here because it is rather complex and not fully understood yet. ENSO seems to cause pressure anomalies in the Northern Hemisphere also influencing the North Atlantic Oscillation, which affects the weather, in Europe and elsewhere. The regional weather conditions affect the biospheric CO<sub>2</sub> uptake and release, which is reflected in the regional growth rate of CO<sub>2</sub> concentrations. Beverly et al. (2024) recently published a paper listing the proposed ENSO-Europe teleconnection mechanisms.

Beverly, J. D., Collins, M., Lambert, F. H., and Chadwick, R.: Drivers of changes to the ENSO–Europe teleconnection under future warming, *Geophysical Research Letters*, 51, e2023GL107957, <https://doi.org/10.1029/2023GL107957>, 2024.

#### 4 Summary

Consider changing the summary to a conclusion, highlighting e.g. the value in such long-term observational data time series, their usage by others (modellers...) etc. This would strengthen the manuscript.

It is not easy to draw conclusions from an essentially descriptive review study. The main conclusion is that the slow tendencies presented in the paper could not be revealed in a shorter time series. Therefore, the long-term, uninterrupted operation of the monitoring sites is essential for a better understanding of the processes, and for revealing interactions and feedbacks. We have tried to reformulate the section accordingly.

#### Technical corrections

##### Abstract:

Line 9: be specific: “GAW ID code: HUN”. Consider adding WIGOS station identifier 0-348-4-16307, here or later in Section 2.1

The station identification codes have been moved from the abstract to Section 2.1 where the WIGOS station identifier is also given in the revised manuscript.

## 1 Introduction

Line 19: consider changing “raised” to “suggested”

Corrected.

Line 22: add “that” before “it might”

Corrected.

Line 29: delete “However,” starting the sentence with “One of the main (...)”

We feel that “however” is needed to emphasize the contradiction between the original concept (as far from the biosphere as possible) and the need to understand the role of the biosphere in the global carbon budget.

Line 31: insert “background” after “global”

Corrected.

Line 45: exchange “several” with “many”

Corrected.

Line 63: exchange “development” with “expansion”

Corrected.

## 2 Measurements and data

Line 83: delete square brackets, and add “which includes e.g.” “after 6% other”. Delete comma and “etc” after “settlements”

Corrected.

Line 84: “lessivated” without capitalised L

Corrected.

Line 85: delete comma after “Alfisol”

Corrected.

Line 91: unclear what type of road “2x1-line” describes, how many lanes?

Corrected. (2-lane, one lane in each direction.)

Line 169: consider changing “multi-elevation monitoring site” to “multi inlet height monitoring site”

Corrected.

Line 183/184: change to “Today models try to avoid these transition periods (...)”

Corrected.

Line 184: change to “CO<sub>2</sub> concentration tends to be low.”

Corrected.

Line 198: exchange “ventilated” with “flushed”

Corrected.

Line 200/201: change “Intake” to “intake”, not capitalising the word

The sentence has been rephrased following the suggestion of the other Referee.

Line 219: delete one full stop at the end of sentence

Corrected.

### 3 Results and discussion

Line 323: in second square brackets delete comma before “2”

Corrected.

Line 354: delete “overlying”

Corrected.

Line 401: first use of “NDVI”, please spell out

Corrected.

Line 436: consider changing “permanent” to “steady”

Corrected.

Line 446: change “bend” to “band”

Corrected.

Line 468: change “Barring Head” to “Baring Head”

Corrected.

Line 471: change “Plateau Rose” to “Plateau Rosa”

Corrected.

Line 492: delete “yet”

The section has been completely rewritten.
